# Supplementary figures and images for: Metaviromics Reveals Unknown Viral Diversity in the Biting Midge Culicoides impunctatus
Source: MDPI journal article supplement (doi:10.3390/v11090865), 2019-09-17

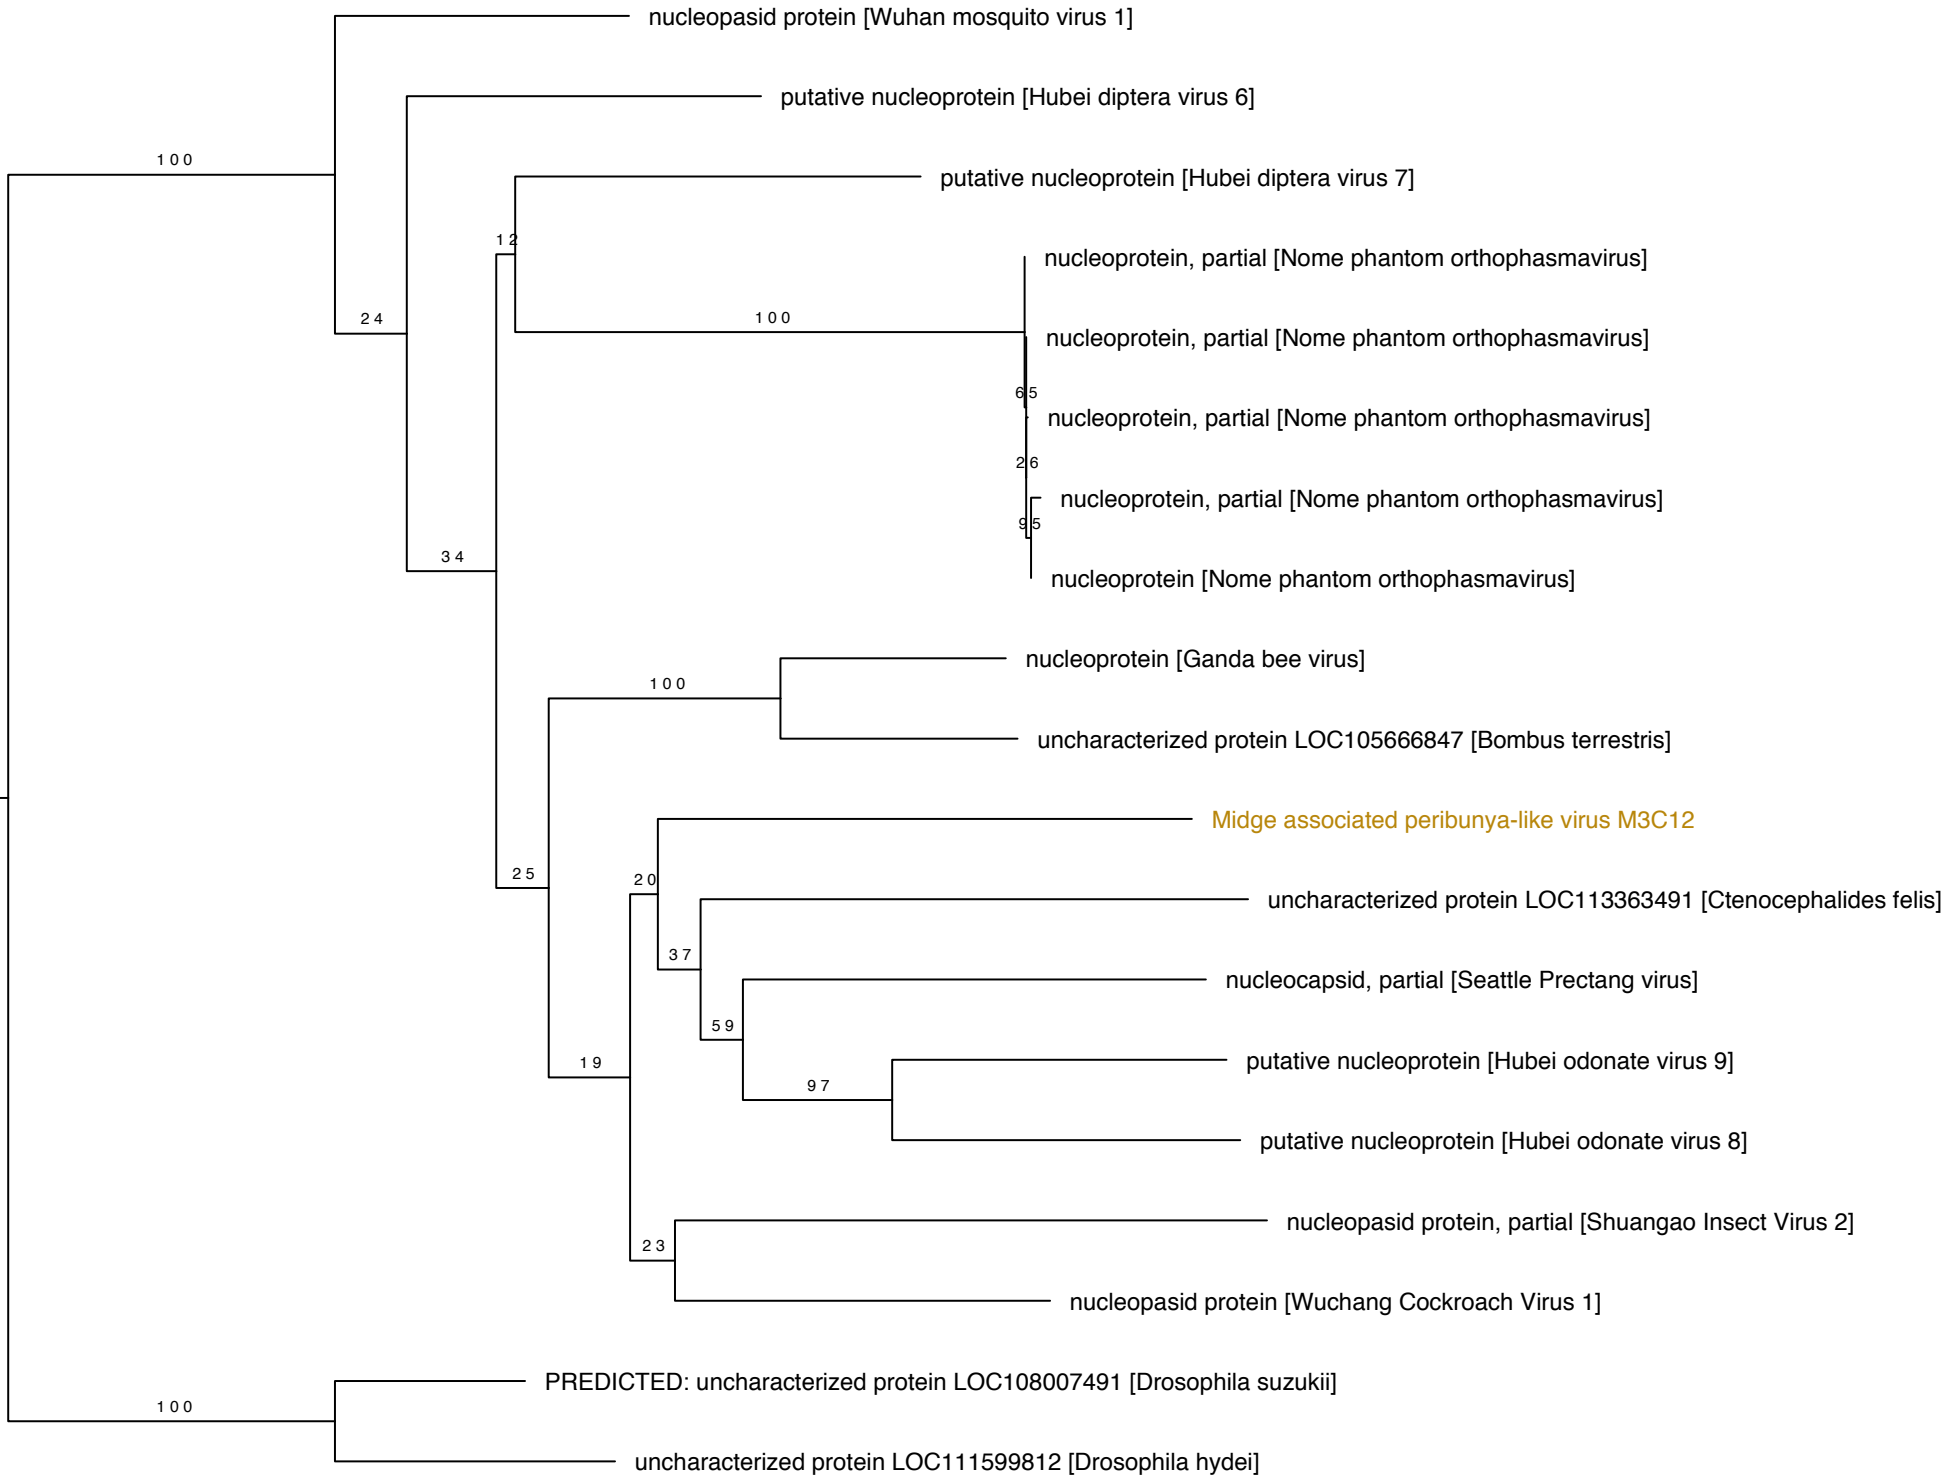

0.3

Supplement: s1 [file s1]

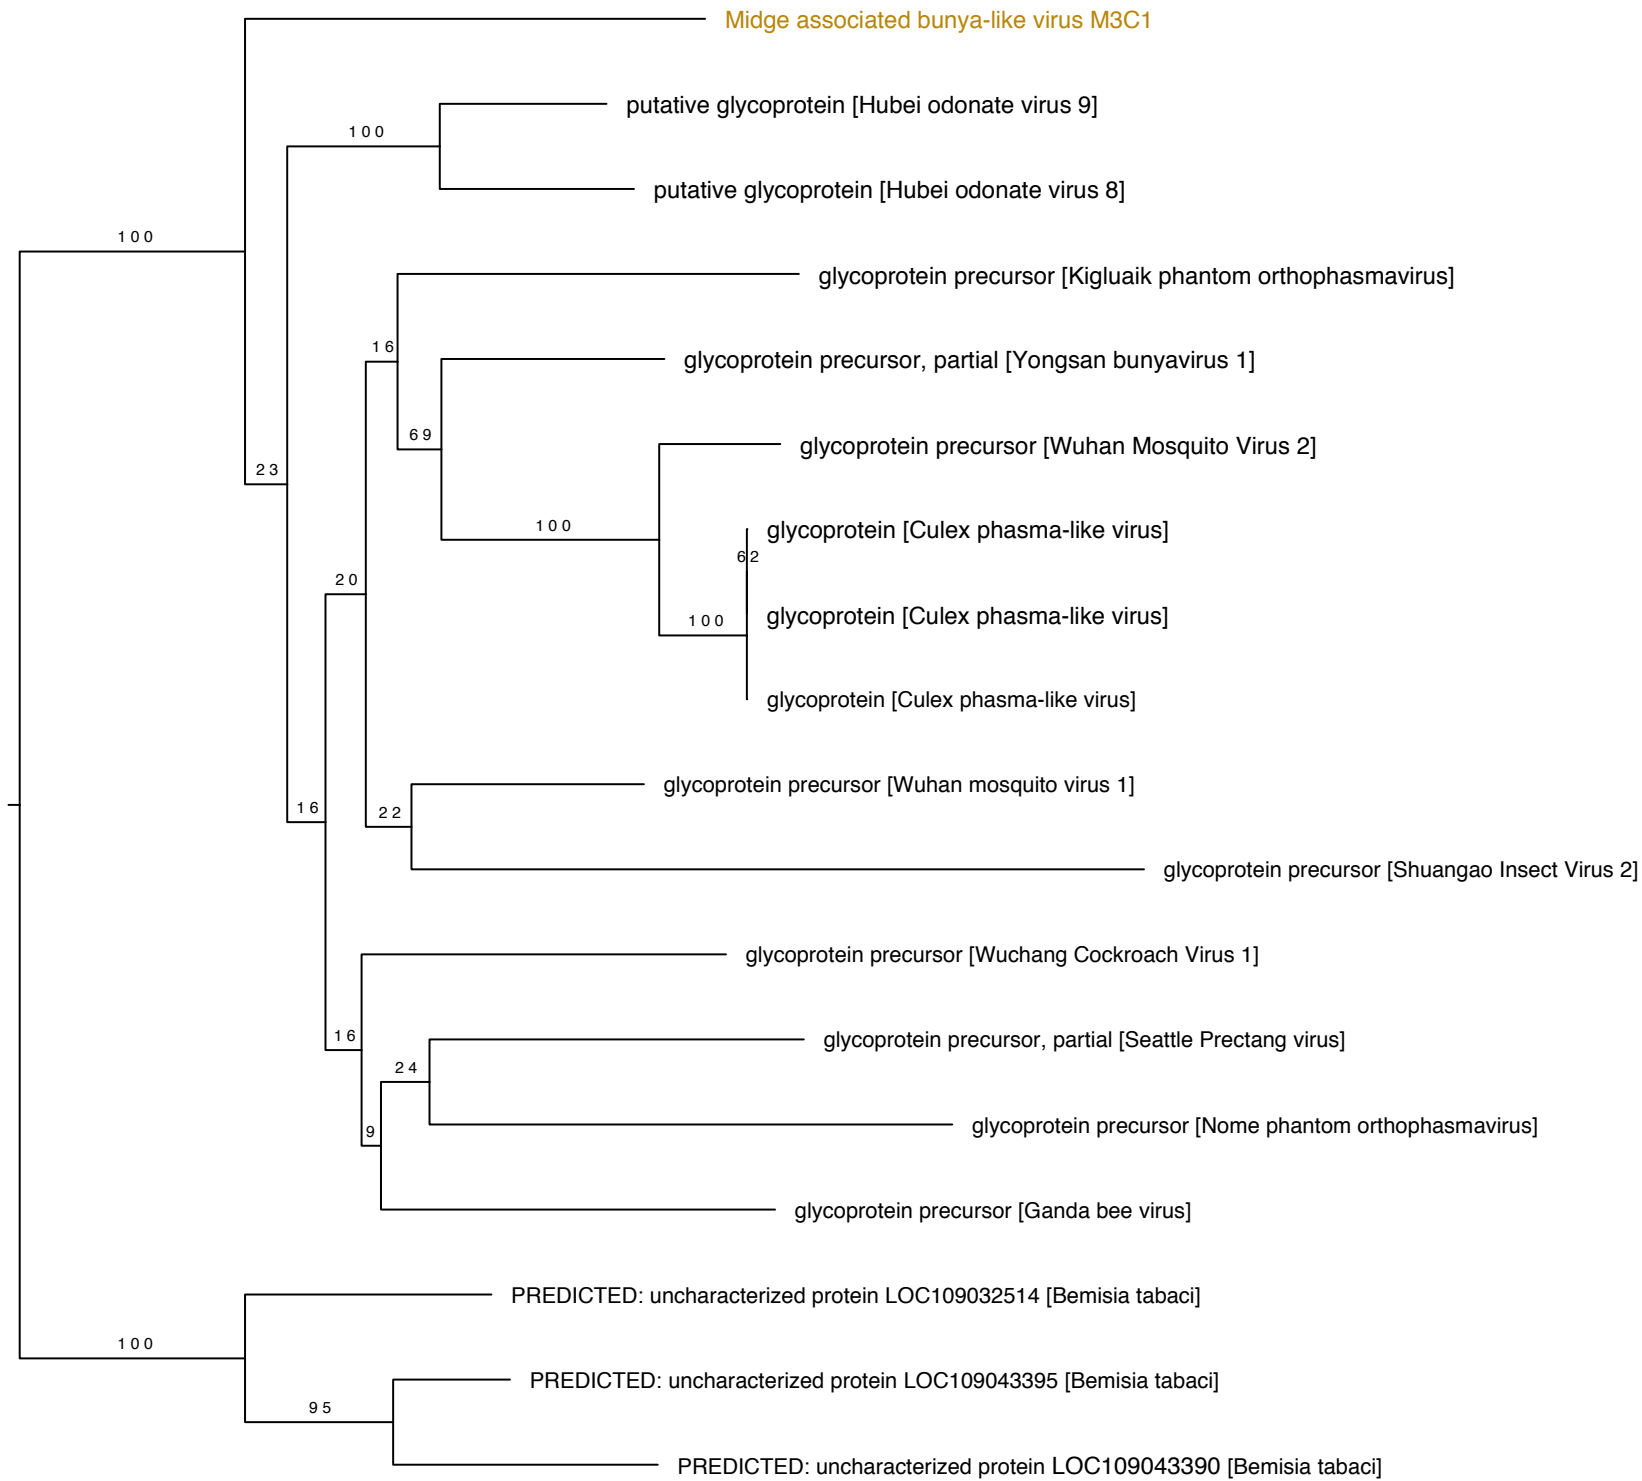

0.3

Supplement: s1 [file s1]

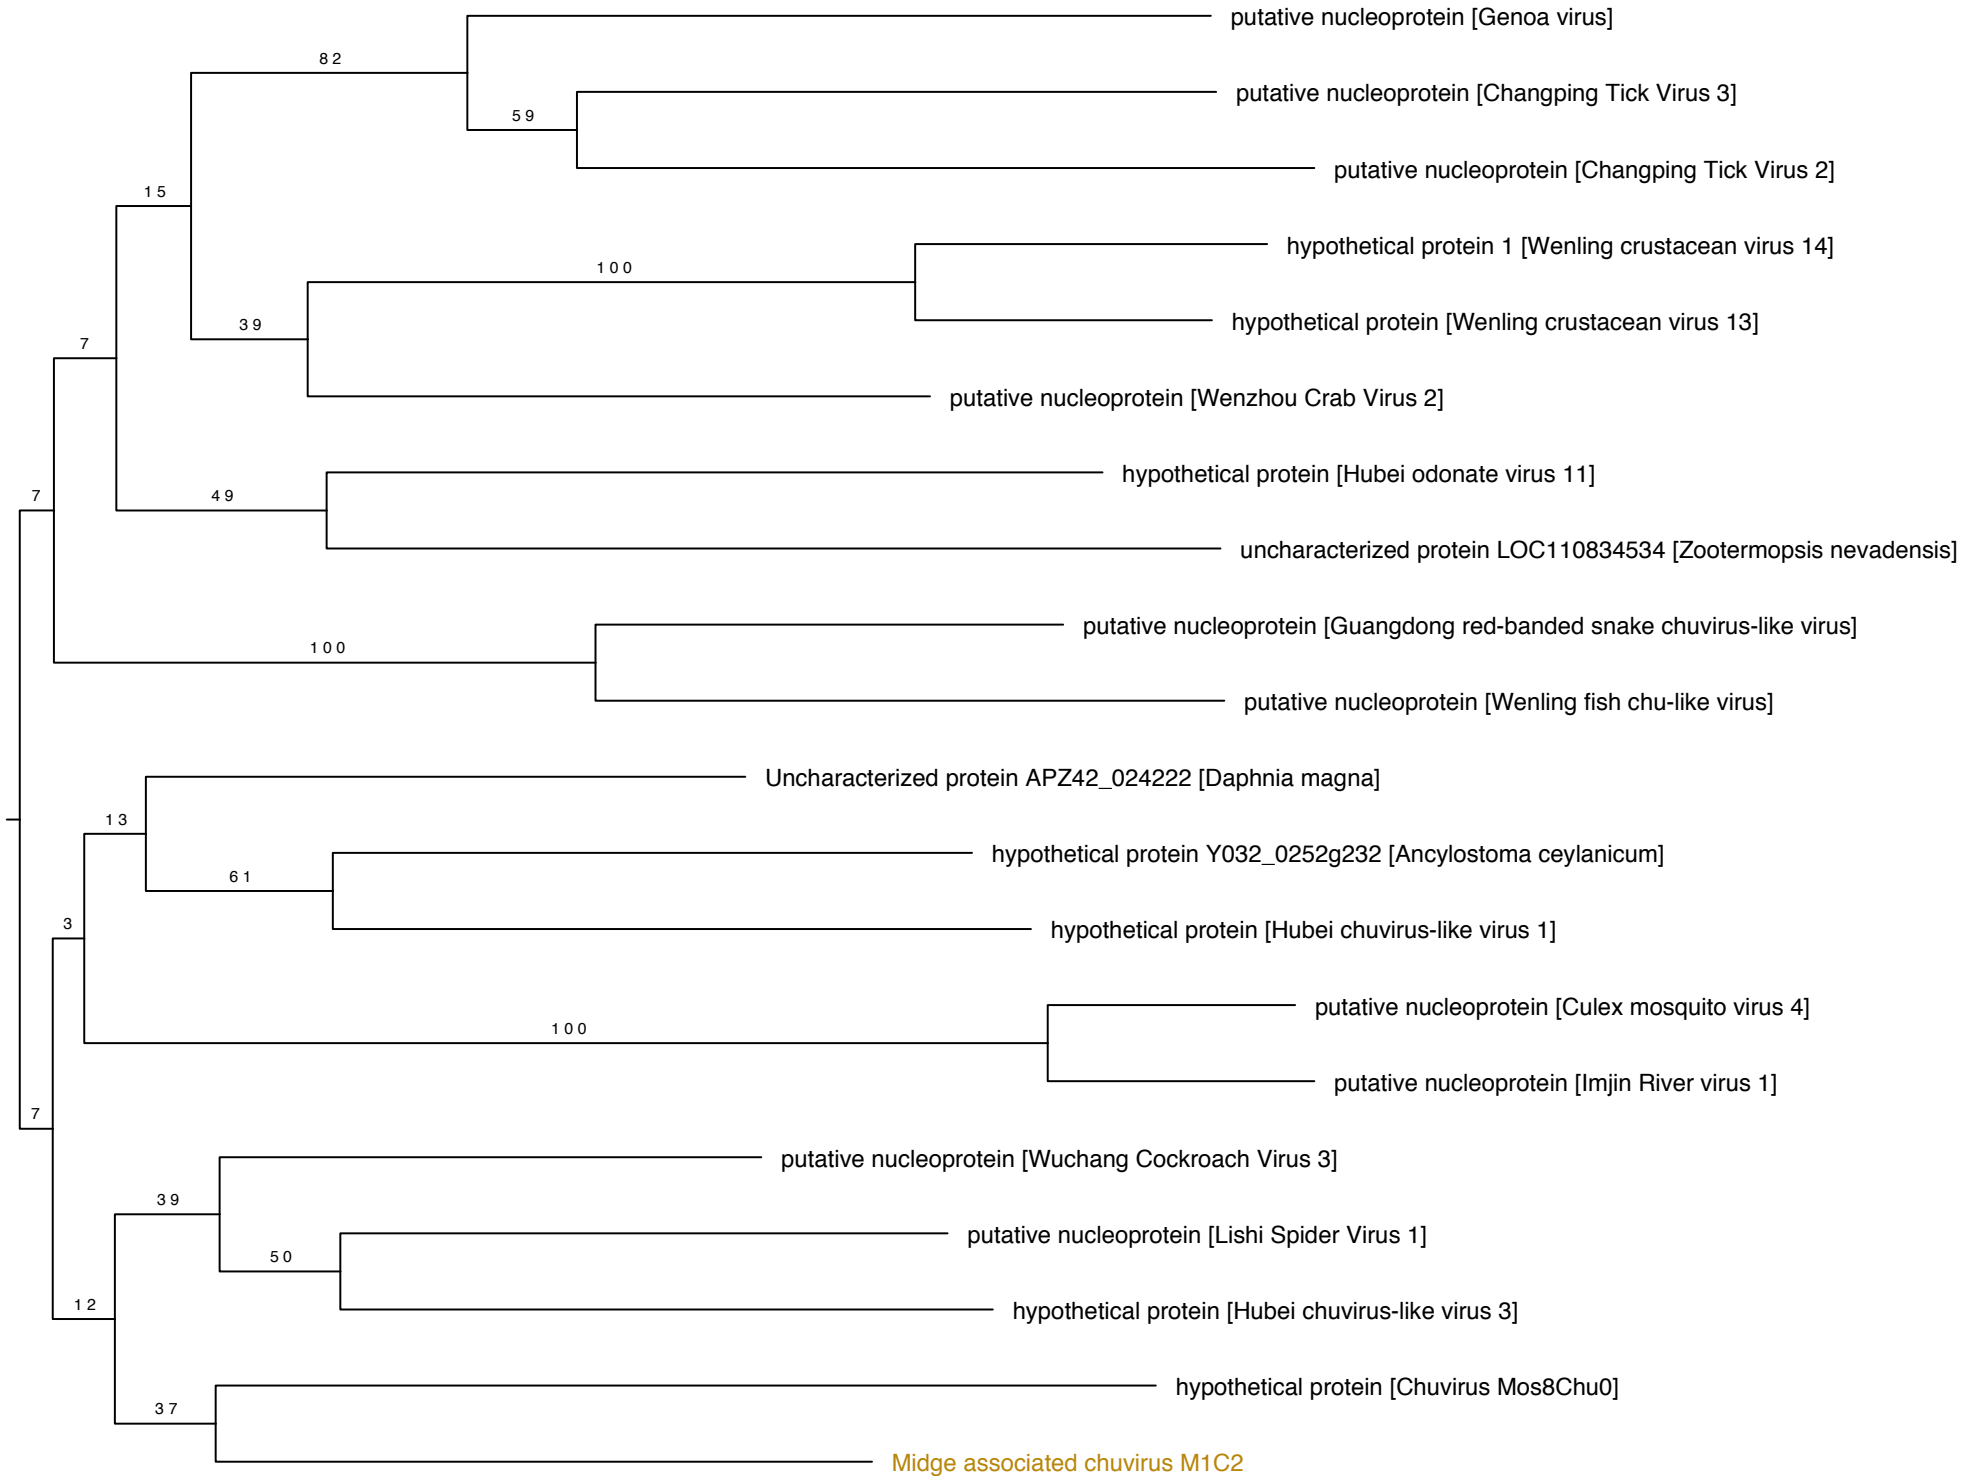

0.3

Supplement: s1 [file s1]

A.

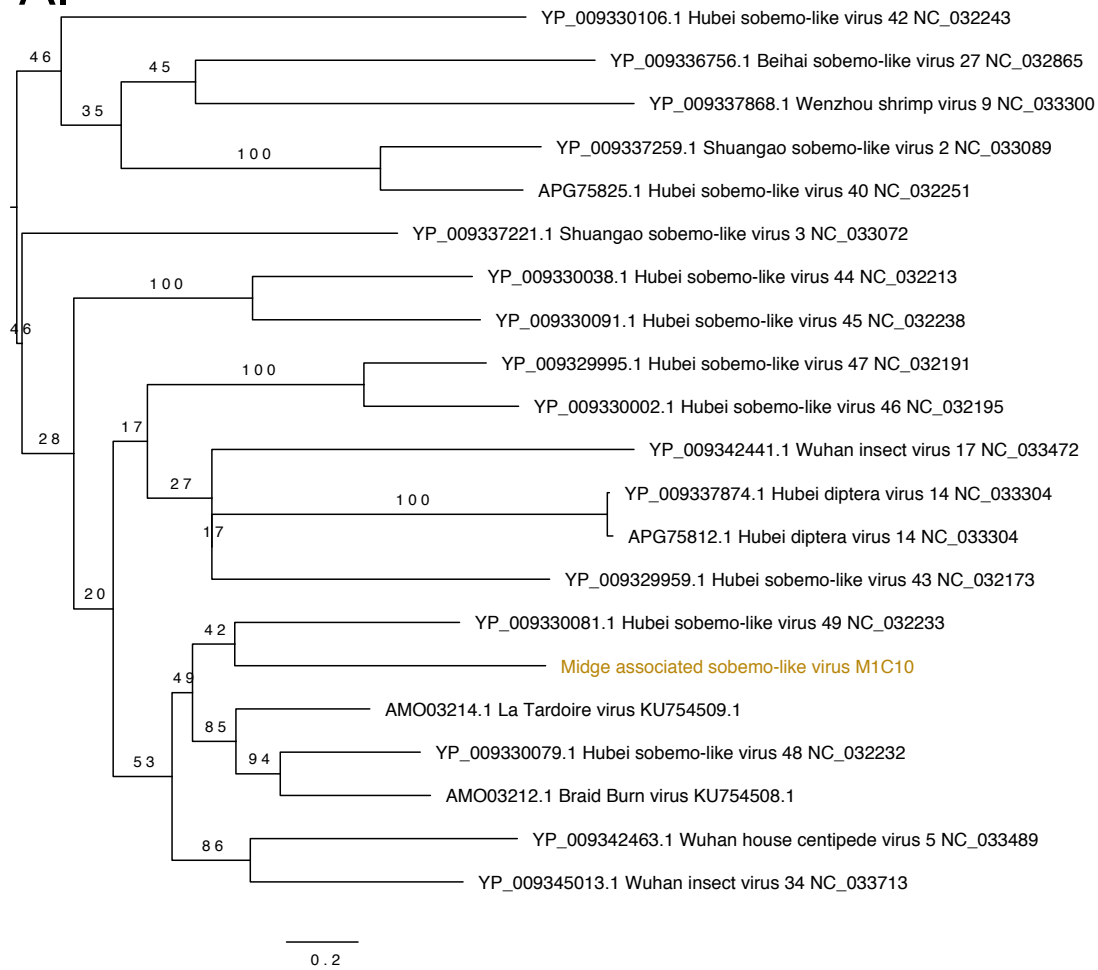

B.

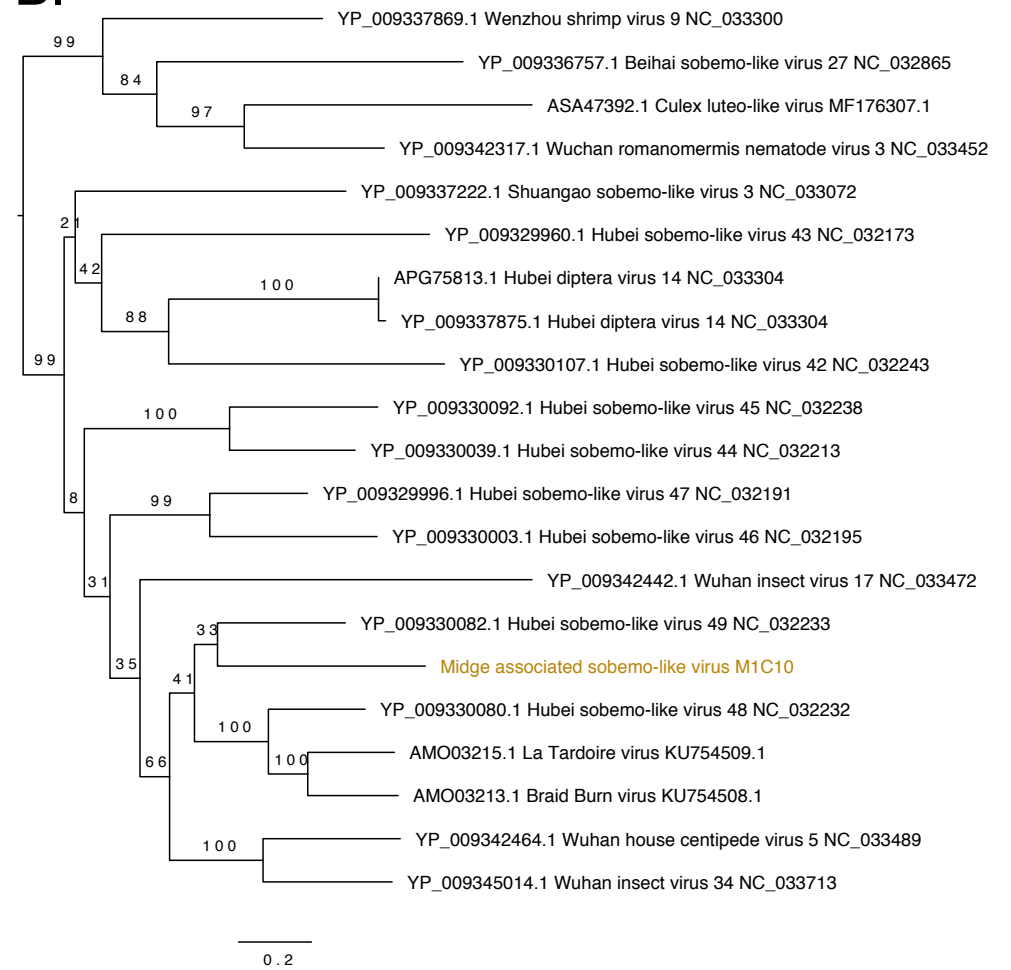

Supplement: s1 [file s1]

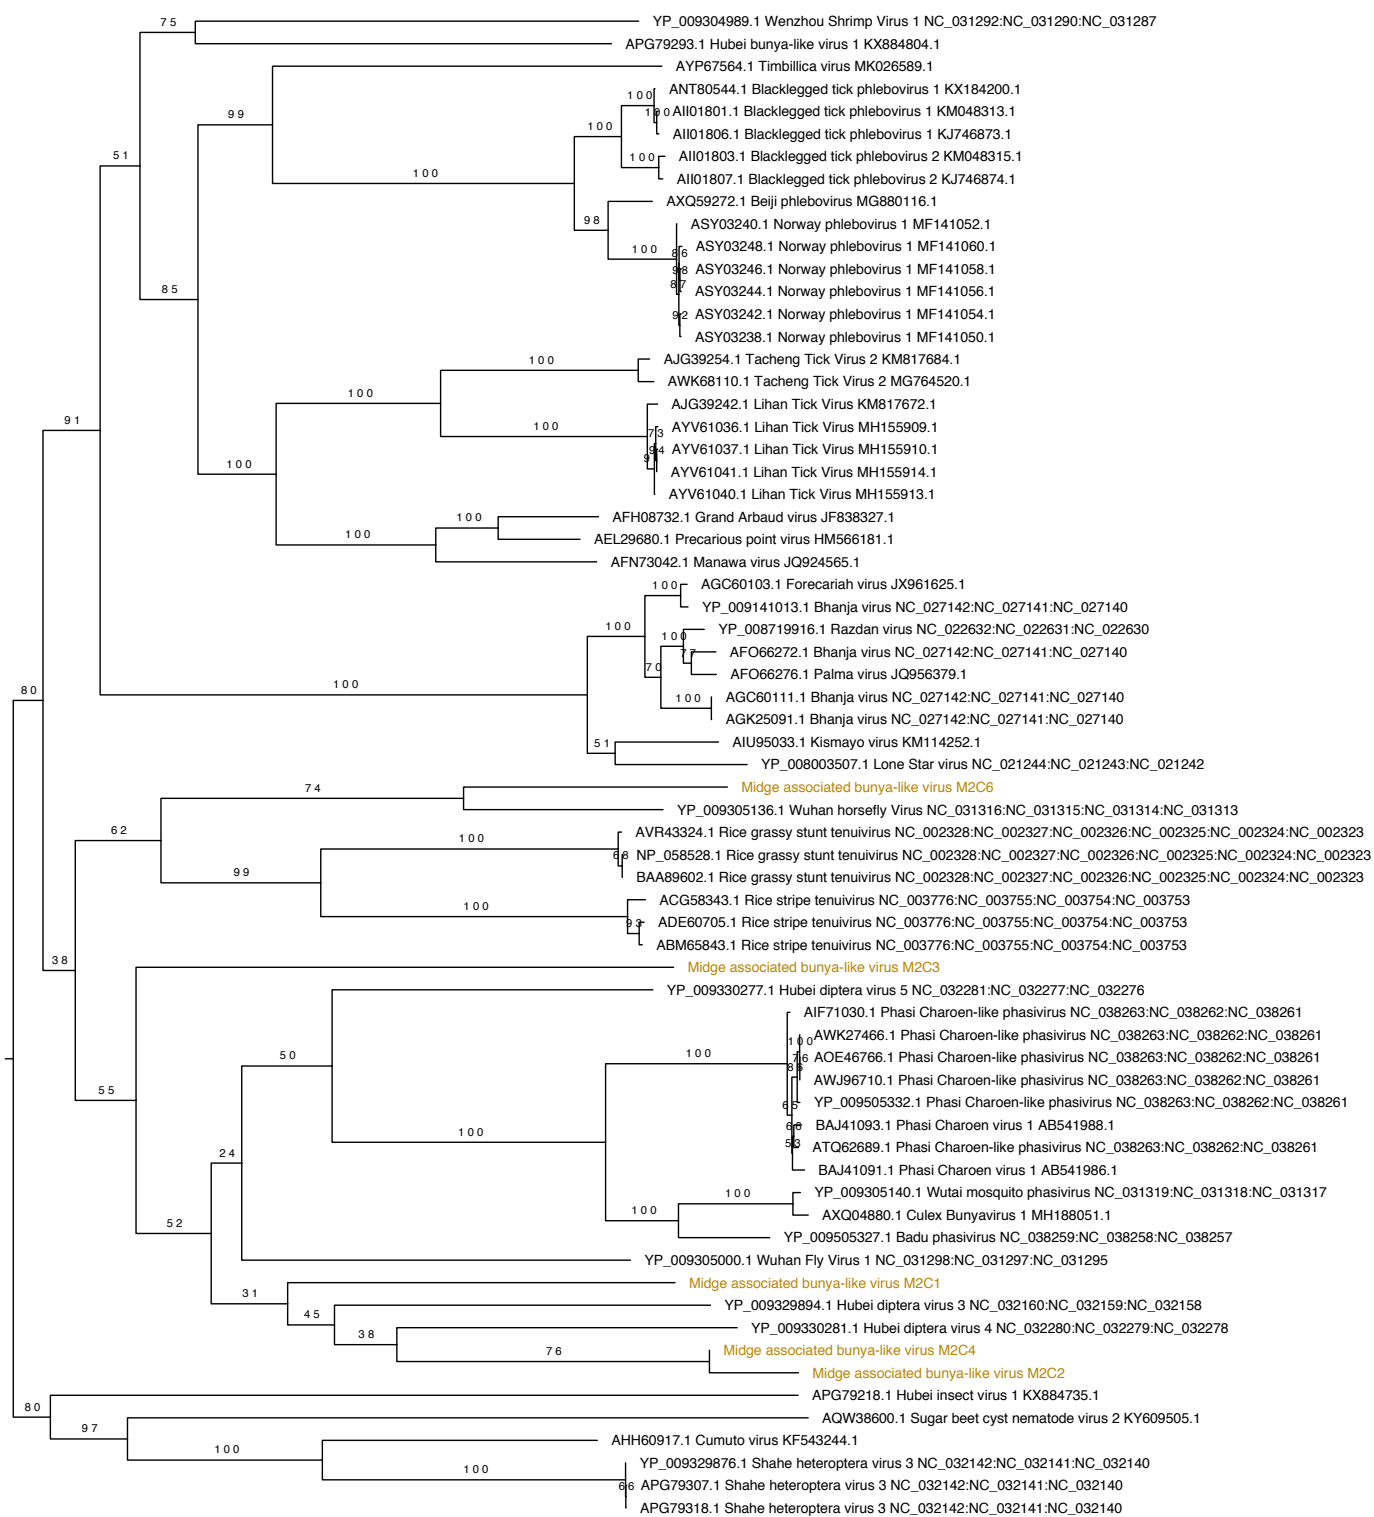

Supplement: s1 [file s1]

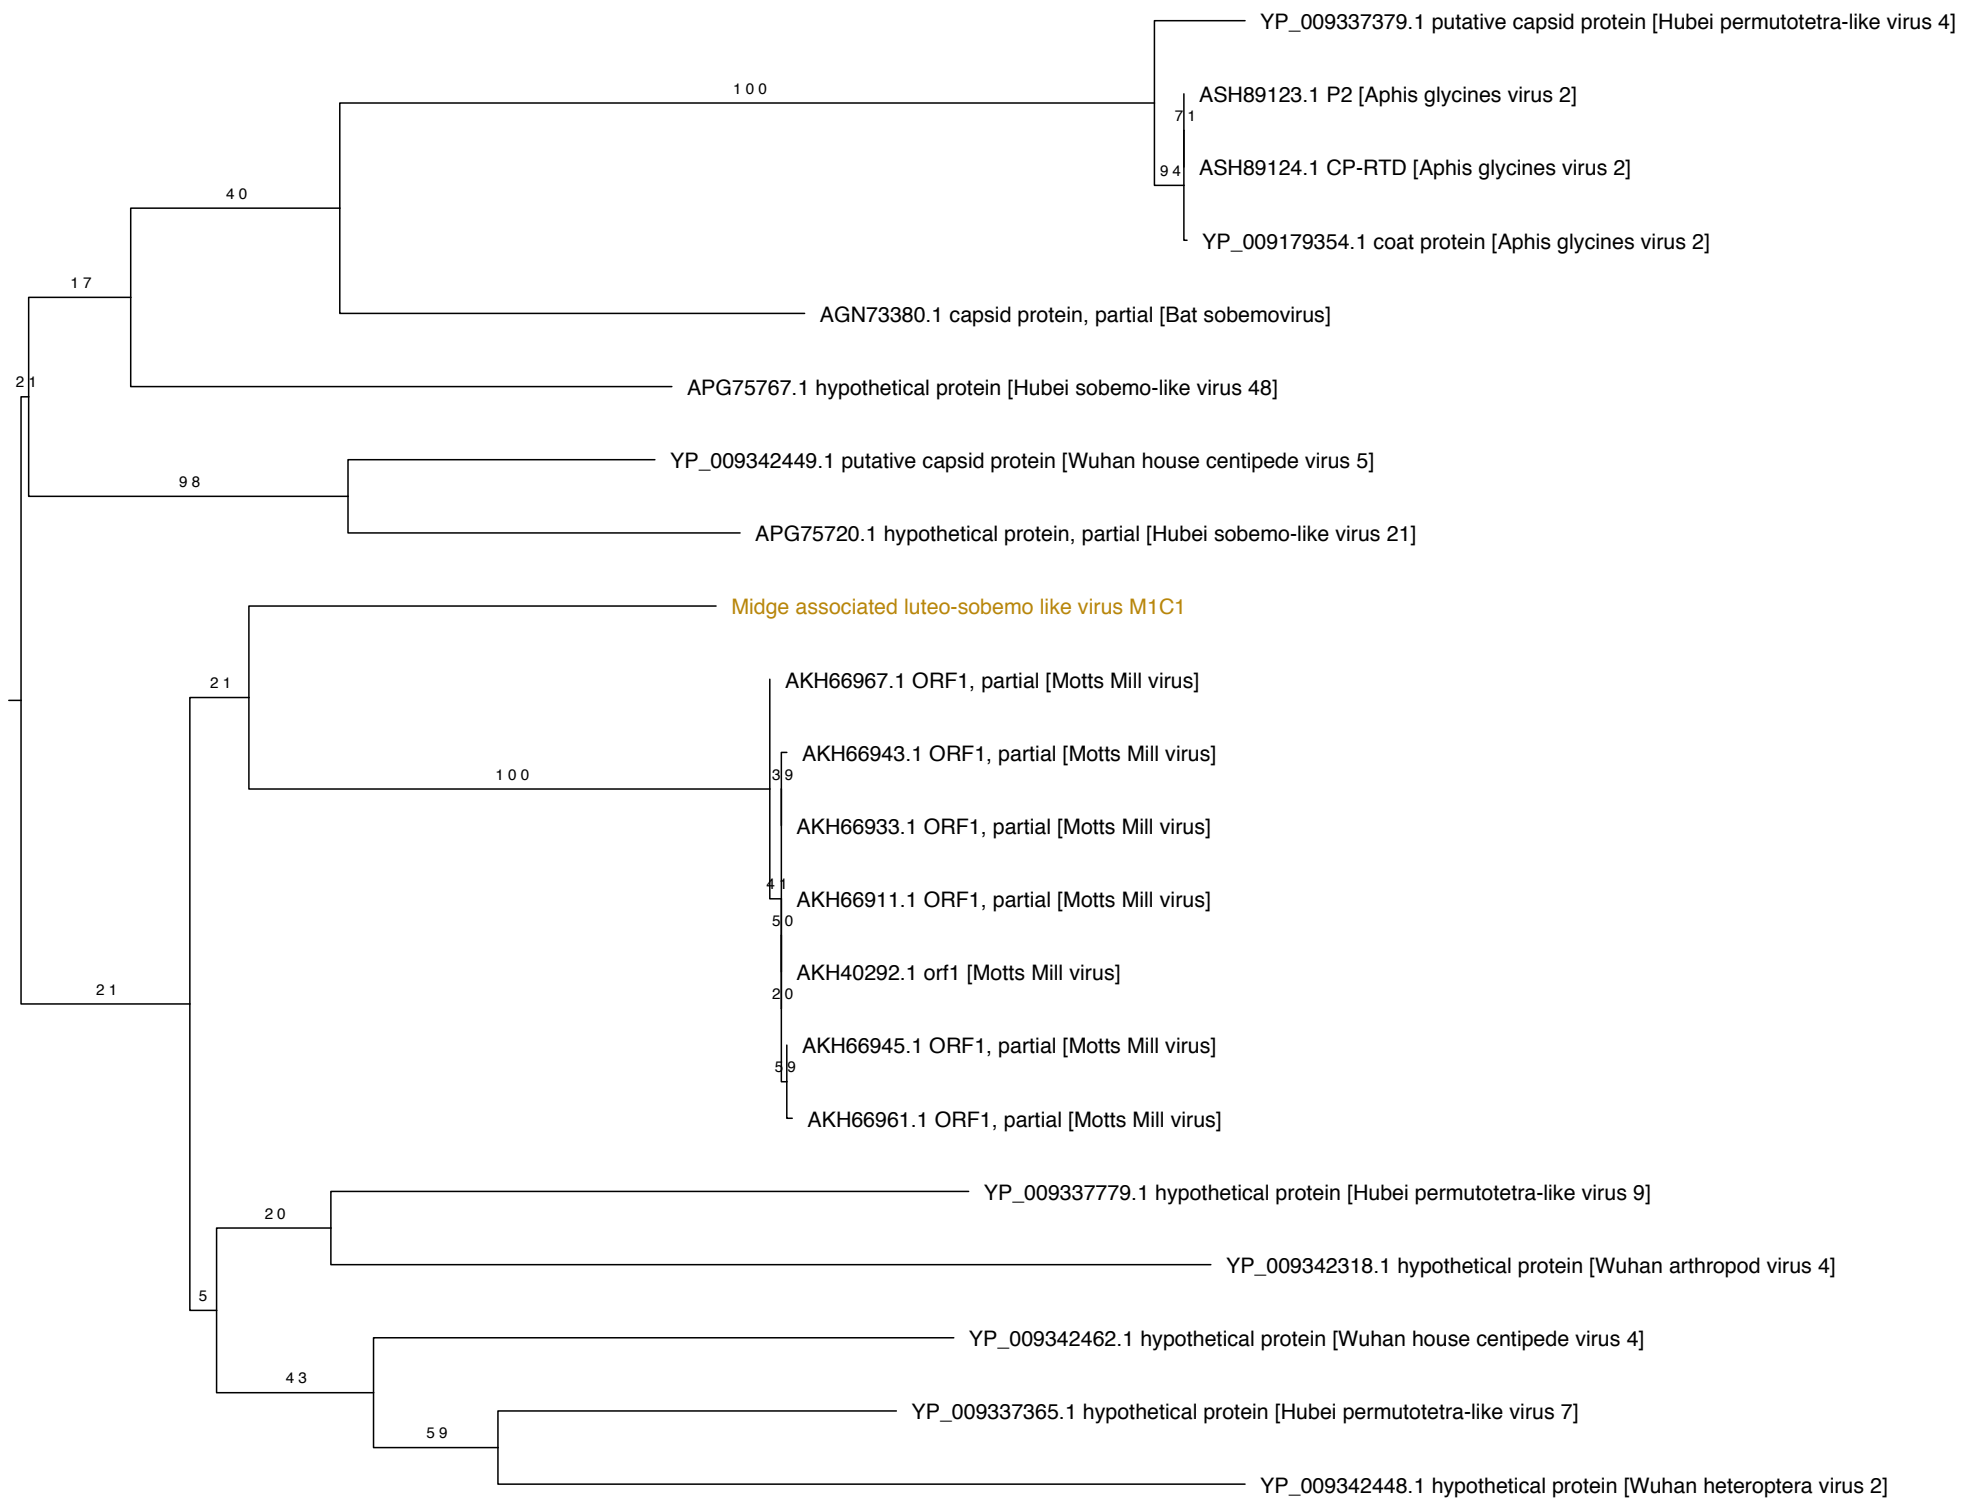

Supplement: s1 [file s1]

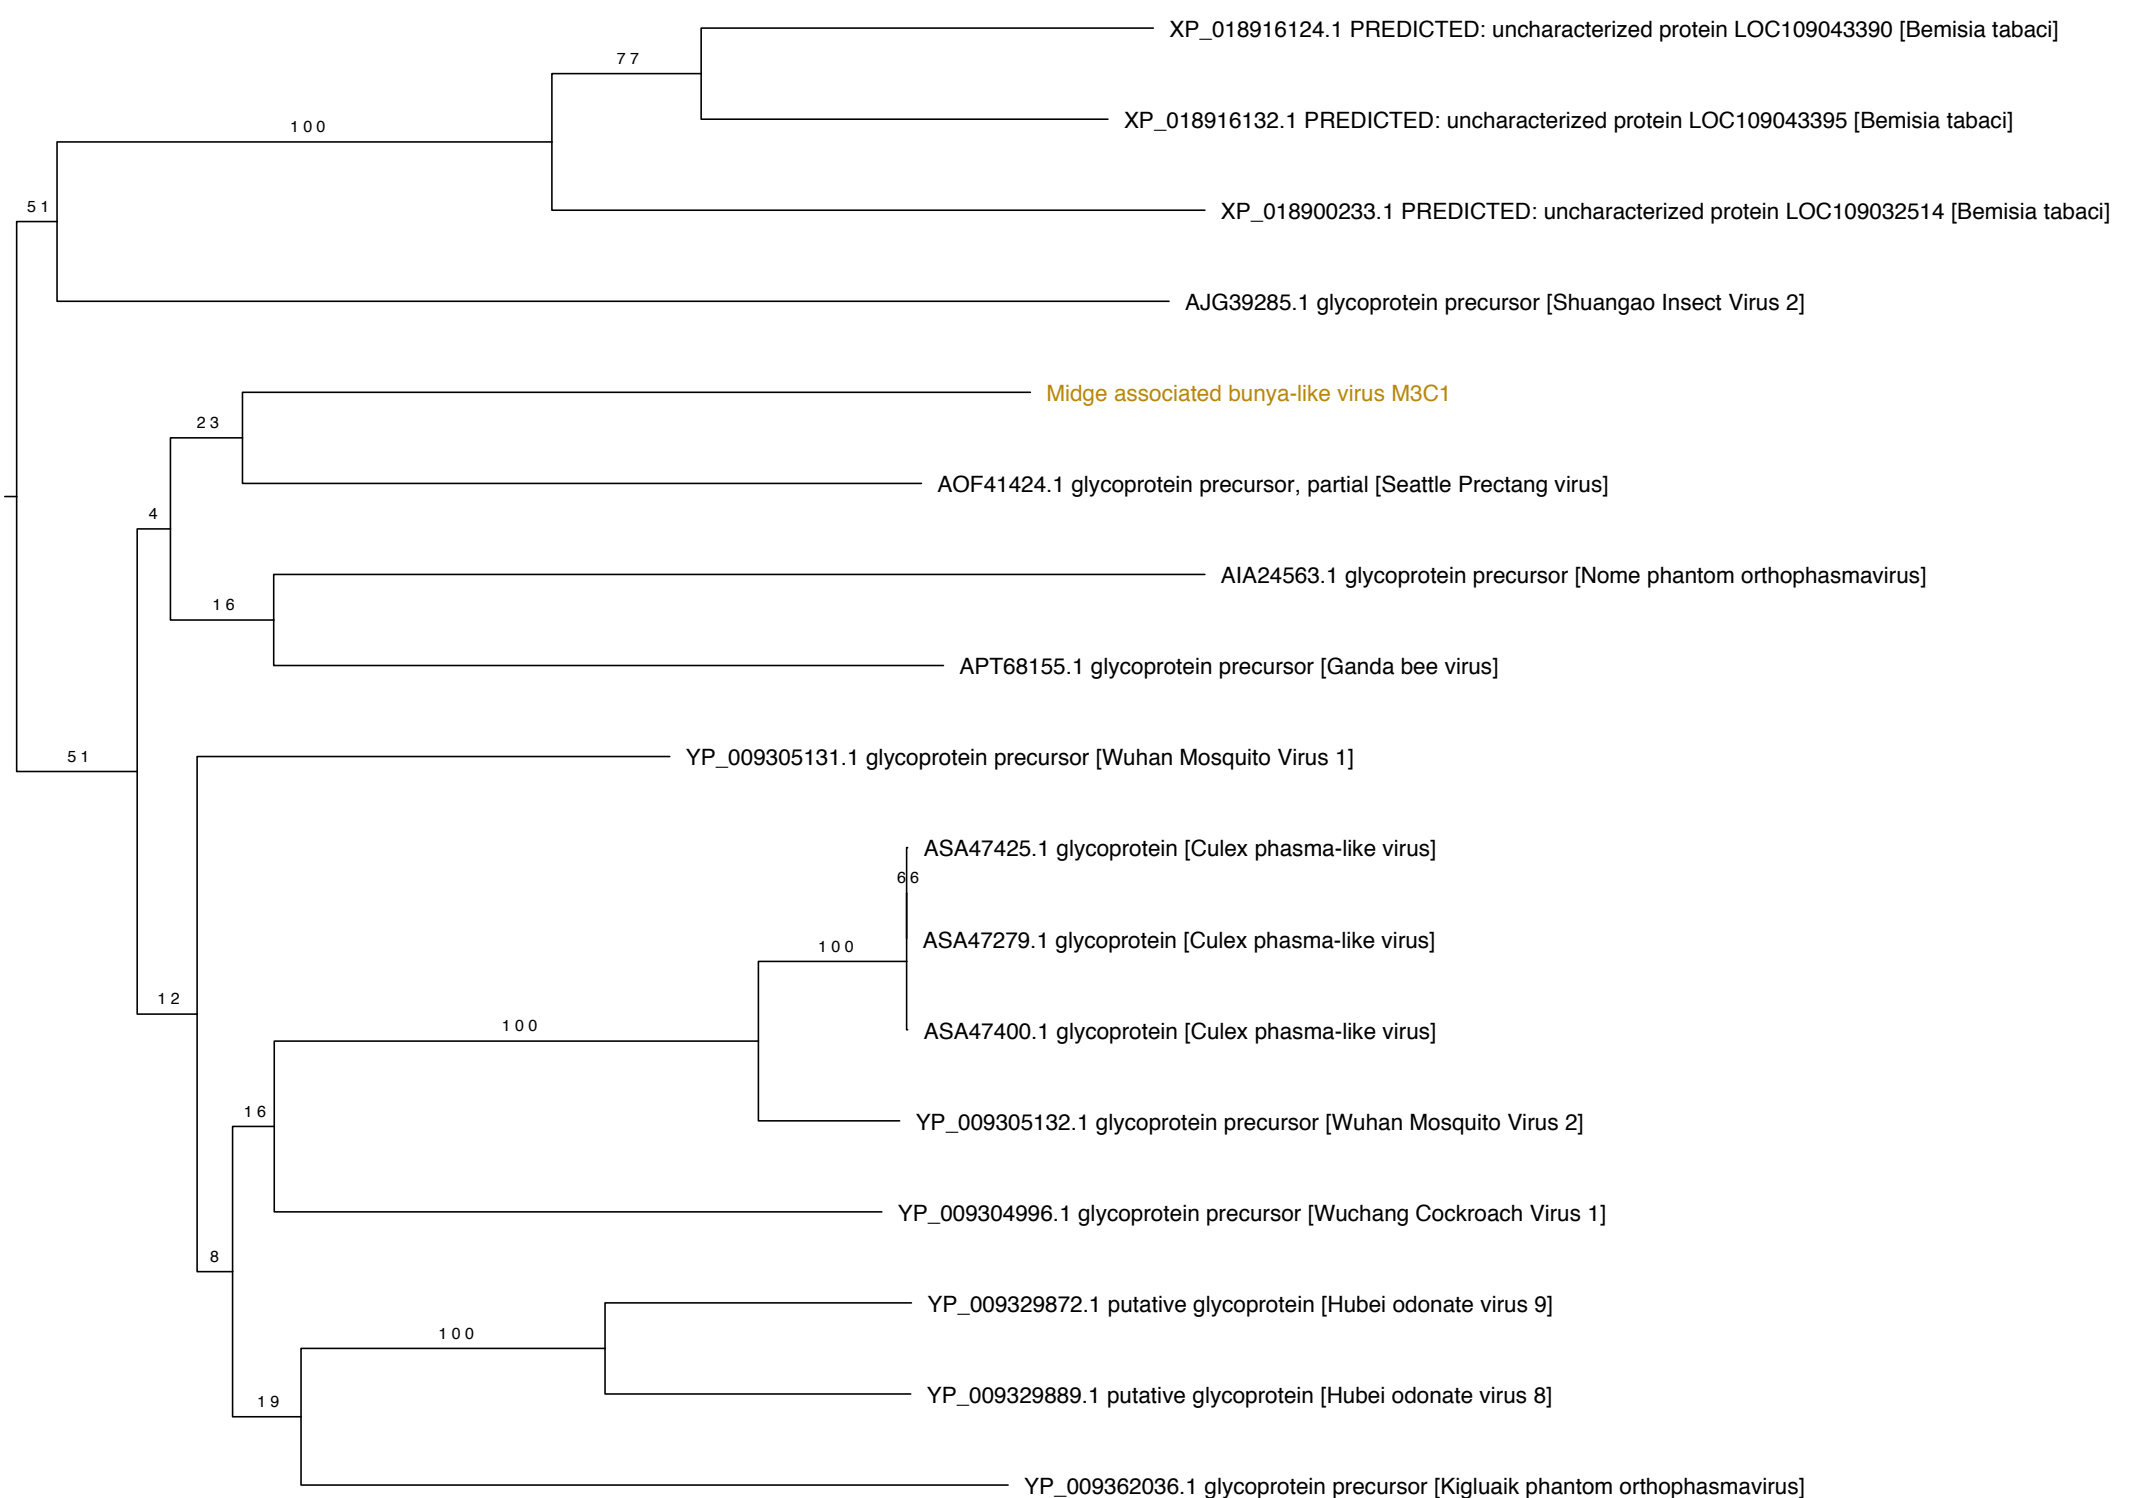

0.2

Supplement: s1 [file s1]
